# Supplementary figures and images for: Selection of a Child Clinical Outcome Measure for Statewide Use in Publicly Funded Outpatient Mental Health Programs
Source: Atypon-hosted journal article supplement (doi:10.1176/appi.ps.201800424), 2019-02-28

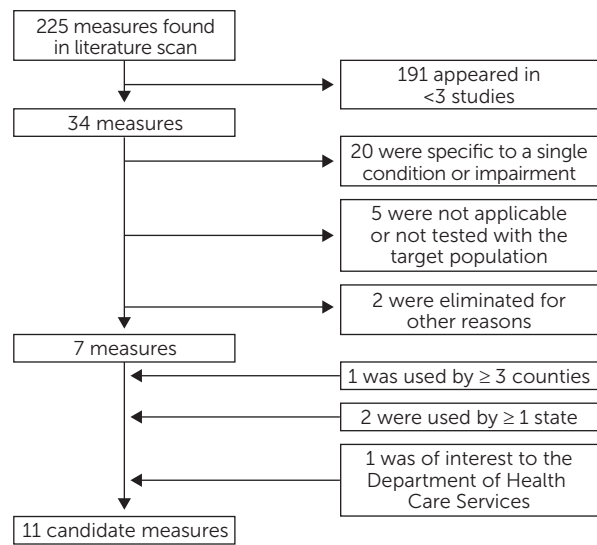

Supplement: appi.ps.201800424.ds001.pdf [file appi.ps.201800424.ds001.pdf]
